# Supplementary material
Source: HighWire-hosted journal article supplement (https://www.jneurosci.org/highwire/filestream/598331/field_highwire_adjunct_files/2/Supp._Fig_3.pdf)
Supplement: Supp._Fig_3.pdf [file Supp._Fig_3.pdf]

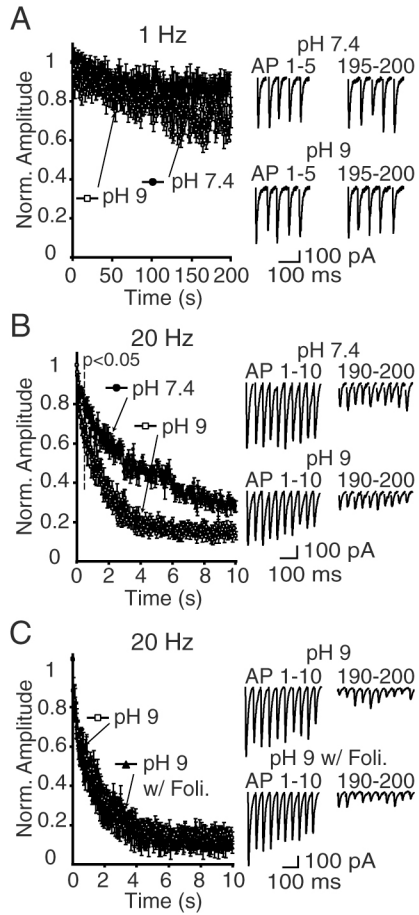

*Supplementary Figure 3, Effect of alkaline pH ACSF perfusion on synaptic depression rate at excitatory CA1 hippocampal synapses. A,B, Plots showing the effect of alkaline pH perfusion at 1 Hz (A) and 20 Hz (B) stimulation (n=5 cells for each group of experiments). Switching the pH of ACSF from 7.4 to 9 induces an effect similar to what we see with the other manipulations that we performed to block vesicular refilling. C, At alkaline pH the effect of folimycin is occluded (n=5 cells for each group). A,B,C, Insets show the first and last pulses from individual experiments for each protocol.*
